# Supplementary material
Source: PubMed Central journal article supplement (PMC11514055)
Supplement: NIHMS2026981-supplement-Supplementary_material.pdf [file NIHMS2026981-supplement-Supplementary_material.pdf]

**Supplementary Text and Tables**  
**for**  
**Proposed study designs for approval based on a surrogate endpoint and a post-**  
**marketing confirmatory study under FDA's accelerated approval regulations for disease**  
**modifying osteoarthritis drugs**

**Authors**

Virginia Byers Kraus, MD, PhD

Lee S Simon, MD

Jeffrey N Katz, MD, MS

Tuhina Neogi, MD, PhD

David Hunter, MBBS, MSc, PhD

Ali Guermazi, MD, PhD

Morten A Karsdal, PhD

**Definitions:**

**Clinical Endpoint:** A characteristic or variable that reflects how a patient feels, functions, or survives.

**Intermediate Clinical Endpoint:** A measurement of a therapeutic effect that can be measured earlier than an effect on irreversible morbidity or mortality and is considered reasonably likely to predict the drug's effect on irreversible morbidity or mortality or other clinical benefit.

**Surrogate Endpoint:** A marker, such as a laboratory measurement, radiographic image, physical sign, or other measure, that is thought to predict clinical benefit, but is not itself a measure of clinical benefit.

**Real-World Data (RWD):** data relating to patient health status and/or the delivery of health care routinely collected. This includes data elements captured in a patient's electronic health record (EHR), in a hospital or insurance company's administrative and claims data, directly from patients or providers in the course of an observational study, from sources of patient-generated information outside of clinical settings (e.g., in-home monitoring devices, wearable technologies, fitness trackers), and in registries that support various aspects of care and research (derived from Berger et al, 2017<sup>1</sup>).

**Real-World Evidence (RWE):** evidence derived from RWD through the application of research methods. It conceptually allows for prospective capture of a wider variety of data, and utilization of study designs that are embedded in clinical practice but retain randomization (derived from Berger et al, 2017<sup>1</sup>).

## Biomarker Nomenclature

One key issue which is often overlooked and which leads to much confusion and miscommunication is the lack of use of a common vocabulary that is tailor-made for a given purpose. To have and use the same description of key definitions is crucial for success<sup>2</sup>. The Biomarkers, Endpoints, and other Tools (BEST) resource<sup>3</sup> is a glossary that aims to capture distinctions between biomarkers and clinical assessments and to describe their distinct roles in biomedical research, clinical practice and medical product development. Other definitions have been developed and used such as BIPEDS (burden of disease, investigational, efficacy of intervention, diagnostic and safety biomarker classifications)<sup>4, 5</sup>. BIPEDS is a general categorization that is easy to remember, whereas BEST is a specialist nomenclature suited to clinical trial work with drugs. As seen from **Supplementary Table 1** (using examples from other disease areas), BIPEDS categories provide a broad, high-level categorization and the BEST categories provide subcategories of different types that correspond to each BIPEDS category. Both apply to biochemical and clinical intermediate endpoints. BEST also defines different levels of surrogate endpoints, which is extremely useful for generating regulatory documents and for assisting those discussions. **Supplementary Table 1** is extracted and amended from the BEST resource guide<sup>3</sup>.

**Supplementary Table 1. General use categories per BIPEDS<sup>4, 5</sup> and FDA (BEST)<sup>3</sup> nomenclature.**

| CATEGORY          |                      | DEFINITION                                                                                                                                                                                                              | EXAMPLES                                                                                                                                                                                                                                                                                                                                                                                                                      |
|-------------------|----------------------|-------------------------------------------------------------------------------------------------------------------------------------------------------------------------------------------------------------------------|-------------------------------------------------------------------------------------------------------------------------------------------------------------------------------------------------------------------------------------------------------------------------------------------------------------------------------------------------------------------------------------------------------------------------------|
| BIPEDS Category   | BEST Category        |                                                                                                                                                                                                                         |                                                                                                                                                                                                                                                                                                                                                                                                                               |
| Burden of Disease |                      | Biomarker associated with the extent of disease severity.                                                                                                                                                               | <ul style="list-style-type: none"> <li>Prostate-specific antigen (PSA) is the most widely utilized marker for evaluating disease burden of prostate cancer<sup>6</sup>.</li> <li>Cancer antigen 125 (CA 125) may be used as a monitoring biomarker when assessing disease status or burden during and after treatment in patients with ovarian cancer<sup>7-10</sup>.</li> </ul>                                              |
| Investigative     |                      | Biomarker does not yet meet the criteria for another category; it may be used in preclinical (animal) models for retrotranslational studies to understand disease mechanism.                                            | <ul style="list-style-type: none"> <li>Any marker in development that does not meet criteria for any one of the other categories.</li> </ul>                                                                                                                                                                                                                                                                                  |
| Prognostic        | Predictive biomarker | Identify those subjects who are more prone than similar subjects, to experience a favorable or unfavorable effect after exposure to a drug or environmental agent (thus refers to the likelihood of treatment effects). | <ul style="list-style-type: none"> <li>Certain cystic fibrosis transmembrane conductance regulator (CFTR) mutations may be used in clinical trials evaluating treatment for cystic fibrosis, to select patients more likely to respond to particular treatments<sup>11</sup>.</li> <li>Serological levels of HCV-RNA and its subtypes may be used to predict treatment response in patients with chronic hepatitis</li> </ul> |

|                                 |                                           |                                                                                                                                                                                                                                                                                 |                                                                                                                                                                                                                                                                                                                                                                                                                                             |
|---------------------------------|-------------------------------------------|---------------------------------------------------------------------------------------------------------------------------------------------------------------------------------------------------------------------------------------------------------------------------------|---------------------------------------------------------------------------------------------------------------------------------------------------------------------------------------------------------------------------------------------------------------------------------------------------------------------------------------------------------------------------------------------------------------------------------------------|
|                                 |                                           |                                                                                                                                                                                                                                                                                 | C <sup>12, 13</sup>                                                                                                                                                                                                                                                                                                                                                                                                                         |
| <b>Prognostic</b>               | <b>Prognostic biomarker</b>               | Identify probability of a clinical event, disease recurrence or progression in patients with the medical condition of interest (thus refers to the likelihood of disease-related events).                                                                                       | <ul style="list-style-type: none"> <li>• Marker of Type III Collagen formation, PRO-C3, may be used to identify patients with significantly elevated PRO-C3 at an early stage of liver disease and thus most likely to develop into progressive liver fibrosis<sup>14</sup>.</li> <li>• BRCA1/2 mutations may be used when evaluating women with breast cancer, to assess the likelihood of a second breast cancer<sup>15</sup>.</li> </ul> |
| <b>Prognostic</b>               | <b>Susceptibility/Risk biomarker</b>      | Assessing the potential for developing a medical condition in a subject who does not currently have any symptoms                                                                                                                                                                | <ul style="list-style-type: none"> <li>• Factor V Leiden may be used as a susceptibility/risk biomarker to identify individuals with a predisposition to develop deep vein thrombosis (DVT)<sup>16</sup>.</li> </ul>                                                                                                                                                                                                                        |
| <b>Efficacy of Intervention</b> | <b>Monitoring biomarker</b>               | Assessing the possible effect of exposure to a drug or an environmental agent.                                                                                                                                                                                                  | <ul style="list-style-type: none"> <li>• CTX-I has been validated by FDA under the 510(k) regulation and is used as an efficacy of intervention biomarker. Early changes in CTX-I, 4-8 weeks, predict changes after 1-2 years in bone mineral density (BMD) of the lumbar spine<sup>17</sup>.</li> </ul>                                                                                                                                    |
| <b>Efficacy of Intervention</b> | <b>Pharmacodynamic/response biomarker</b> | <ul style="list-style-type: none"> <li>• Pharmacodynamic or response biomarker: a biomarker that is used to show that a biological response has occurred</li> <li>• Display if a biological response has occurred after exposure to a drug or an environmental agent</li> </ul> | <ul style="list-style-type: none"> <li>• Serum LDL cholesterol may be used when evaluating patients with hypercholesterolemia, to assess response to a lipid-lowering agent or dietary changes<sup>18</sup>.</li> <li>• HbA1c may be used when evaluating patients with diabetes, to assess response to antihyperglycemic agents or lifestyle changes<sup>19</sup>.</li> </ul>                                                              |
| <b>Efficacy of Intervention</b> | <b>Surrogate endpoint</b>                 | Surrogate endpoint: an endpoint that is used in a clinical trial as a substitute for a direct measure of how a patient feels, functions or survives. A surrogate endpoint does not itself measure the clinical benefit of primary interest, but rather is expected to predict   | <ul style="list-style-type: none"> <li>• HIV viral load.</li> <li>• Lowering blood pressure has repeatedly been shown, with a wide variety of drugs, to reduce the incidence of stroke and cardiovascular disease in people with</li> </ul>                                                                                                                                                                                                 |

|                   |                             |                                                                                                                                                                                                                                                                                 |                                                                                                                                                                                                                                                                                                                                       |
|-------------------|-----------------------------|---------------------------------------------------------------------------------------------------------------------------------------------------------------------------------------------------------------------------------------------------------------------------------|---------------------------------------------------------------------------------------------------------------------------------------------------------------------------------------------------------------------------------------------------------------------------------------------------------------------------------------|
|                   |                             | clinical benefit or harm based on epidemiological, therapeutic, pathophysiological or other scientific evidence.                                                                                                                                                                | hypertension.<br>• Serum urate in gout <sup>20</sup>                                                                                                                                                                                                                                                                                  |
| <b>Diagnostic</b> | <b>Diagnostic biomarker</b> | <ul style="list-style-type: none"> <li>• Differentiate disease from non-disease states</li> <li>• Detect or confirm the presence of a disease or medical condition of interest.</li> <li>• Identify individuals with a subtype of the medical condition of interest.</li> </ul> | <ul style="list-style-type: none"> <li>• Blood glucose levels may be used to identify patients with Type 2 diabetes mellitus<sup>21</sup>.</li> <li>• Gene expression may be used to segregate patients with diffuse large B-cell lymphoma into subgroups with different tumor cell of origin signatures<sup>22</sup>.</li> </ul>     |
| <b>Diagnostic</b> | <b>Monitoring biomarker</b> | <ul style="list-style-type: none"> <li>• Monitoring status of a medical condition by repeated measurements.</li> <li>• Monitoring biomarker: a biomarker that is measured serially and used to detect a change in the degree or extent of disease.</li> </ul>                   | <ul style="list-style-type: none"> <li>• Marker of Type III Collagen formation, PRO-C3, may be used when assessing status and progression/regression of liver fibrosis patients.</li> <li>• DXA for osteoporosis</li> </ul>                                                                                                           |
| <b>Safety</b>     | <b>Safety</b>               | Measure before and/or after exposure to a drug or environmental agent to assess possible toxicity as an adverse effect                                                                                                                                                          | <ul style="list-style-type: none"> <li>• Hepatic aminotransferases and bilirubin may be used as safety biomarkers when evaluating potential hepatotoxicity<sup>23</sup>.</li> <li>• Serum creatinine may be used when evaluating patients on drugs that affect kidney function to monitor for nephrotoxicity<sup>24</sup>.</li> </ul> |

BIPEDS: burden of disease, investigative, prognostic, efficacy of intervention, diagnostic and safety. Data from REFS<sup>3-5</sup>.

## What is a surrogate?

The FDA may grant accelerated approval for a drug that has demonstrated, in adequate and well-controlled trials, an effect on a “surrogate endpoint” that is reasonably likely, based on epidemiologic, therapeutic, pathophysiologic, or other evidence, to predict clinical benefit”<sup>25, 26</sup>. Based on FDA guidance on accelerated approvals, “a surrogate endpoint is a marker, such as a laboratory measurement, radiographic image, physical sign, or other measure, that is thought to predict clinical benefit, but is not itself a measure of clinical benefit”<sup>27</sup>. Three levels of surrogacy are recognized<sup>3, 27</sup>: a “validated” surrogate endpoint that has been shown to predict or correlate with clinical benefit (and that could therefore be used as a basis for traditional approval); a “reasonably likely” surrogate endpoint that correlates with clinical benefit (and that may be used for accelerated approval but with a post-approval confirmatory study) but is without sufficient clinical data to show that it is a validated surrogate endpoint; or, based on the Biomarkers, Endpoints, and other Tools (BEST) nomenclature<sup>3</sup>, a “candidate” surrogate endpoint that is still under evaluation for its ability to predict clinical benefit (see **Supplementary Table 2** for biomarker examples).

**Supplementary Table 2. Different levels of surrogacy based on the BEST resource guide<sup>3</sup>.**

| Endpoint                                    | Definition                                                                                                                                                                                                                                                                                                                                                                                                                                                                                                                                                                                                                                                          | Example                                                                                                                                                                                                                                                                                                              |
|---------------------------------------------|---------------------------------------------------------------------------------------------------------------------------------------------------------------------------------------------------------------------------------------------------------------------------------------------------------------------------------------------------------------------------------------------------------------------------------------------------------------------------------------------------------------------------------------------------------------------------------------------------------------------------------------------------------------------|----------------------------------------------------------------------------------------------------------------------------------------------------------------------------------------------------------------------------------------------------------------------------------------------------------------------|
| <b>Validated surrogate endpoint</b>         | <ul style="list-style-type: none"> <li>An endpoint supported by a clear mechanistic rational and clinical data providing strong evidence that an effect on the surrogate endpoint predicts a clinical benefit. Therefore it can be used to support traditional approval without the need for additional efficacy information.</li> </ul>                                                                                                                                                                                                                                                                                                                            | <ul style="list-style-type: none"> <li>Low-density lipoprotein (LDL) cholesterol reduction is a validated surrogate endpoint for reduction of cardiovascular events and has been used as the basis for approval of statins and other LDL-lowering drugs.</li> </ul>                                                  |
| <b>Reasonably likely surrogate endpoint</b> | <ul style="list-style-type: none"> <li>An endpoint supported by clear mechanistic and/or epidemiological rationale but insufficient clinical data to show that it is a validated surrogate endpoint. Such endpoints can be used for accelerated approval for drugs or expedited access for medical devices. In the case of accelerated approval for drugs, additional trial data, assessing the effect of the intervention of the clinical beneficial endpoint of interest will be collected in the post-marketing setting to verify whether an effect on the reasonable likely surrogate actually predicts benefit in the specific context under study.</li> </ul> | <ul style="list-style-type: none"> <li>Outcomes of 6-month follow-up treatment i.e., sputum culture status and infection relapse rate, have been considered reasonably likely to predict the resolution of pulmonary tuberculosis and have supported accelerated approval of drugs to treat tuberculosis.</li> </ul> |
| <b>Candidate surrogate endpoint</b>         | <ul style="list-style-type: none"> <li>An endpoint still under evaluation for its ability to predict clinical benefit.</li> </ul>                                                                                                                                                                                                                                                                                                                                                                                                                                                                                                                                   | <ul style="list-style-type: none"> <li>Early fungicidal activity is currently proposed as a candidate surrogate endpoint for all-cause mortality in cryptococcal meningitis<sup>28</sup>.</li> </ul>                                                                                                                 |

To aid in this determination, it is helpful to consider the following:

1. How much do changes in the surrogate endpoint reflect changes in the clinical outcome or the probability of the clinical outcome occurring?
2. Is there an understanding of the required degree and timing of change in the surrogate endpoint that represents a clinically meaningful change or absolute change in the clinical outcome?
3. If a threshold for change is selected, what is the basis for its selection, its sensitivity and specificity?
4. Is the change in the threshold stable or does it only occur for a short time? Would timing of sample collection be feasible?

The surrogate endpoint should be based on a comprehensive understanding of the disease process and under ideal circumstances, in the causal pathway of the disease. For a complex disease such as OA, which involves the whole joint and a complicated pathogenesis of bone, cartilage, and synovium, providing evidence of a link to the causal pathway of disease may not be easy. Cartilage has often been discussed as the common denominator, and central for the disease, but biomarkers of bone and synovial pathology may be equally viable, if they are related to outcome. These sentiments are acknowledged by the FDA, in their prior 1999 guidance document:

Structure is a critical component of OA assessment, but the relationships between structure and pain and/or function and between structure and future outcomes (e.g., arthroplasty) are not well developed. At a minimum, cartilage destruction is a necessary but not sufficient prerequisite for arthroplasty. Additionally, OA may be asymptomatic early on, complicating the relationship between structure and outcome. Numerous epidemiological studies are underway to try to clarify these relationships. Because OA is a disease of all the tissues in the joints, not just the cartilage, measurements of *structure* need to be seen broadly and capture important anatomic features, such as osteophytes or ligamentous instability, in addition to cartilage loss<sup>29</sup>.

The majority of surrogates used in trials in other fields and anticipated for use in OA are of the “reasonably likely” surrogate endpoint variety. The determination of “reasonably likely” is based on a synthesis of both statistical reasoning and clinical insight<sup>30, 31</sup> that satisfy the criteria in **Supplementary Table 3**. Interestingly, to date the FDA has accepted serum uric acid level as the primary efficacy endpoint for approval of treatments for hyperuricemia associated with gout<sup>20</sup>. These recommendations are based on informal qualification of this biomarker--long-term cohort studies demonstrating an improvement of clinical disease with the lowering of serum uric acid levels in patients with gout. Interestingly, no therapies for the treatment of hyperuricemia associated with gout have been required to demonstrate a statistically significant effect on clinical outcomes “because of the duration of trials necessary to evaluate such a treatment effect”<sup>20</sup>.

**Supplementary Table 3. Evidence for validating a “reasonably likely” surrogate endpoint (based on Fleming et al. 2005)<sup>30</sup>.**

| Criteria for reasonably likely surrogacy                                                                                                                                                                                                                                               |
|----------------------------------------------------------------------------------------------------------------------------------------------------------------------------------------------------------------------------------------------------------------------------------------|
| • Considerable clinical evidence that the intervention’s effect on the surrogate endpoint will accurately represent the intervention’s effect on what is thought to be the predominant mechanism(s) through which the disease process (OA) induces risk of clinically tangible events. |
| • Considerable clinical evidence that the experimental intervention does not have important adverse effects on the clinical efficacy endpoints that would not be captured by the outcome measure.                                                                                      |
| • Statistical analyses suggest that the net effect of the intervention on the true clinical efficacy measure is consistent with what would be predicted by the level of effect on the outcome measure.                                                                                 |
| • The targeted effect on the outcome measure is sufficiently strong and durable that, based on the relationships specified by the criteria above, this is reasonably likely to predict meaningful clinical benefit on clinical efficacy measures                                       |

## Development hurdles in OA compared to other diseases

Drug development in other disease indications, such as type II diabetes (T2D), involve large outcome studies with more than 10000 patients, not as part of a Subpart H approval process, but still as a post-approval commitment to understand potential benefits of lowering Hba1c and drug-induced potential harms. (**Supplementary Table 4**) Drug development in osteoporosis, like OA, is to some extent also focused on the skeletal system and based on radiographic analysis. Drug approval relies exclusively on a failure of tissue (fracture), without an assessment of a PRO. The phase 3 studies in osteoporosis have been very large, with more than 8000 patients included. Interestingly, the phase 2 studies in osteoporosis rely on imaging techniques that measure the local amount of bone (bone mineral density of the lumbar spine), whereas the phase 3 studies are based on tissue failure assessed by radiograph to investigate fractures in the lumbar spine, as well as fractures at other skeletal sites in later studies. This connection between the assessments using imaging biomarkers in phase 2, which translates to tissue failure in phase 3, may apply to OA.

**Supplementary Table 4. Instructive representative trials.**

| DISEASE                                                                                                                       | PHASE 2B                                                                                                                                                                                                                  | PHASE 3                                                                                                                                                                                                           | POST-APPROVAL PHASE 4 OR SUBPART H STUDY                                                                                                                                                                              |
|-------------------------------------------------------------------------------------------------------------------------------|---------------------------------------------------------------------------------------------------------------------------------------------------------------------------------------------------------------------------|-------------------------------------------------------------------------------------------------------------------------------------------------------------------------------------------------------------------|-----------------------------------------------------------------------------------------------------------------------------------------------------------------------------------------------------------------------|
| <b>Osteoporosis</b><br>Alendronate,<br>Zoledronic acid,<br>Teriparatide,<br>calcitonin,<br>Abaloparatide,<br>and<br>Denosumab | REFS: <sup>32</sup><br>N:<br>200-400 patients<br><br>Endpoint:<br>Imaging by X-ray, BMD<br><br>Duration:<br>6 months to 2 years                                                                                           | REFS: <sup>33-38</sup><br>N:<br>2000-8000 patients<br><br>Endpoint:<br>Fractures determined by X-ray<br><br>Duration:<br>1.5 to 3 years                                                                           | Unnecessary since incidence of fracture is a hard outcome reflecting "survival" of adequate structural bone integrity.                                                                                                |
| <b>NASH</b><br>Elafibrinor,<br>Cenicriviroc,<br>Obetocolic acid                                                               | REFS: <sup>39-41</sup><br>N:<br>200-400 patients<br><br>Endpoint:<br>Histology by liver biopsy<br><br>Duration:<br>6 months to a year                                                                                     | Obetocolic acid, NCT02548351,<br>Elafibrinor, NCT02704403<br>Cenicriviroc, NCT03028740<br>N:<br>2000-2400 patients<br><br>Conditional approval endpoint:<br>Histology by liver biopsy<br><br>Duration:<br>2 years | Subpart H<br><br>N:<br>2000-2400 patient<br><br>Outcome measures:<br>improvement or resolution of NASH without fibrosis worsening (a strong predictor of liver-related deaths) and death<br><br>Duration<br>4-5 years |
| <b>T2D</b><br>GLP-1s,<br>SGLT2s,<br>PPARs                                                                                     | REFS: <sup>42-44</sup><br>N:<br>200-to 450 patients<br><br>Endpoint:<br>HbA1c<br><br>Duration:<br>3-6 months                                                                                                              | REFS: <sup>45-50</sup><br>N:<br>400 to 1500 patients<br><br>Endpoint:<br>HbA1c<br><br>Duration:<br>6 months to 2 years                                                                                            | REFS: <sup>51-55</sup><br><br><b>OUTCOME STUDY</b><br>N:3300- to 10500 patients years<br><br>Endpoint: MACE 3,<br>cardiovascular outcome<br><br>Duration:<br>1-3 years                                                |
| <b>OA</b><br>Calcitonin,<br>Sprifermin (FGF-18),<br>Risedronate,<br>Cindunistat                                               | REFS: <sup>56-59</sup> and NCT01919164<br>N:<br>200-550-1500 patients<br><br>Endpoints:<br>Structure by Imaging such as X-ray or MRI<br><br>Function:<br>PRO such as WOMAC<br><br>Duration:<br>6 months to a year or more | REFS: <sup>60, 61</sup><br>N:<br>1000-2500 patients<br><br>Endpoints:<br>Structure by imaging such as imaging or MRI<br><br>Function:<br>PRO, such as WOMAC<br><br>Duration:<br>2 years or more                   | N:<br>1000-2000 patients<br><br>Endpoints:<br>The topic of this discussion                                                                                                                                            |

NASH=non-alcoholic steatohepatitis; T2D=type II diabetes; MACE 3=three-point major adverse cardiovascular events; OA=osteoarthritis; MRI=magnetic resonance imaging; PRO=patient-reported outcome; WOMAC=Western Ontario McMaster Universities Osteoarthritis Index



## **Pre-Competitive Consortium in OA – Phase 2 Working Group Members**

### ***Nigel Arden, MB BS, MSc, MD***

Professor in Rheumatic Diseases and Consultant Rheumatologist  
MRC Epidemiology Resource Centre  
University of Southampton  
Southampton General Hospital  
Reader in Musculoskeletal Sciences and Consultant Rheumatologist  
University of Oxford  
Botnar Research Centre  
Nuffield Orthopaedic Centre  
Oxford, United Kingdom

### ***Neil Bodick, MD, PhD***

Chief Scientific Officer & Co-Founder  
Flexion Therapeutics  
Burlington, Massachusetts

### ***Philip Conaghan, MBBS, PhD***

Professor of Musculoskeletal Medicine  
University of Leeds  
Rheumatologist, Leeds Teaching Hospitals NHS Trust  
Deputy Director  
UK National Institute for Health Research, Leeds Biomedical Research Centre  
Leeds, United Kingdom

### ***Ali Guermazi, MD, PhD***

Director, Quantitative Imaging Center  
Professor of Radiology  
Section Chief, Musculoskeletal Imaging  
Boston University School of Medicine  
Boston, Massachusetts

### ***David Hunter, MBBS, MSc, PhD***

Florance and Cope Chair of Rheumatology  
Chair, Institute of Bone and Joint Research  
Professor of Medicine  
University of Sydney  
Sydney, Australia

### ***Morten Karsdal, MSc, PhD***

CEO  
Nordic Bioscience, Biomarkers & Research  
Herlev, Denmark

### ***Jeffrey Katz, MD, MSc***

Professor of Medicine and Orthopedic Surgery  
Director, Scholars in Medicine Program, Harvard Medical School  
Clement B. Sledge and Thomas S. Thornhill Chair in Orthopedic Surgery  
Director, Orthopedic and Arthritis Center for Outcomes Research  
Vice Chair for Orthopedic Research  
Brigham and Women's Hospital  
Boston, Massachusetts

### ***Virginia Byers Kraus, MD, PhD***

Professor, Departments of Medicine (Medicine, Rheumatology and Immunology)  
Professor of Pathology  
Professor in Orthopaedic Surgery  
Member, Duke Molecular Physiology Institute  
Duke University Medical Center  
Durham, North Carolina

### ***Timothy McAlindon, MD, MPH***

Professor of Medicine  
Tufts University  
Sackler School of Graduate Biomedical Sciences  
Boston, Massachusetts

***Tuhina Neogi, MD, PhD***

Professor of Medicine and Epidemiology  
Boston University School of Medicine  
Attending Physician, Rheumatology  
Boston Medical Center  
Boston, Massachusetts

***Lee S. Simon, MD***

Principal, SDG, LLC  
Cambridge, Massachusetts

***Valorie J. Thompson***

Principal  
Innovations Consulting Group LLC  
Washington, DC

**REFERENCES for Supplementary Text and Tables**

1. Berger M, Daniel G, Frank K, Hernandez A, McClellan M, Okun S, Overhage M, Platt R, Romine M, Tunis S, Wilson M, for the Duke-Margolis Center for Health Policy. A framework for regulatory use of real-world evidence. 2017.
2. Kraus VB, Blanco FJ, Englund M, Karsdal MA, Lohmander LS. Call for standardized definitions of osteoarthritis and risk stratification for clinical trials and clinical use. *Osteoarthritis Cartilage* 2015;23(8):1233-41.
3. Food and Drug Administration-NIH Biomarker Working Group. BEST (Biomarkers, EndpointS, and other Tools) Resource. In. Silver Spring, MD: FDA; 2016.
4. Bauer DC, Hunter DJ, Abramson SB, Attur M, Corr M, Felson D, Heinegard D, Jordan JM, Kepler TB, Lane NE, Saxne T, Tyree B, Kraus VB. Classification of osteoarthritis biomarkers: a proposed approach. *Osteoarthritis Cartilage* 2006;14(8):723-7.
5. Kraus VB, Burnett B, Coindreau J, Cottrell S, Eyre D, Gendreau M, Gardiner J, Garner P, Hardin J, Henrotin Y, Heinegard D, Ko A, Lohmander LS, Matthews G, Menetski J, Moskowitz R, Persiani S, Poole AR, Rousseau JC, Todman M. Application of biomarkers in the development of drugs intended for the treatment of osteoarthritis. *Osteoarthritis Cartilage* 2011;19(5):515-42.
6. Koo KC, Park SU, Kim KH, Rha KH, Hong SJ, Yang SC, Chung BH. Predictors of survival in prostate cancer patients with bone metastasis and extremely high prostate-specific antigen levels. *Prostate Int* 2015;3(1):10-5.
7. Canney PA, Moore M, Wilkinson PM, James RD. Ovarian cancer antigen CA125: a prospective clinical assessment of its role as a tumour marker. *Br J Cancer* 1984;50(6):765-9.
8. Rustin GJ, Marples M, Nelstrop AE, Mahmoudi M, Meyer T. Use of CA-125 to define progression of ovarian cancer in patients with persistently elevated levels. *J Clin Oncol* 2001;19(20):4054-7.
9. Rustin GJ, Timmers P, Nelstrop A, Shreeves G, Bentzen SM, Baron B, Piccart MJ, Bertelsen K, Stuart G, Cassidy J, Eisenhauer E. Comparison of CA-125 and standard definitions of progression of ovarian cancer in the intergroup trial of cisplatin and paclitaxel versus cisplatin and cyclophosphamide. *J Clin Oncol* 2006;24(1):45-51.
10. Gundogdu F, Soylyu F, Erkan L, Tatli O, Mavi S, Yavuzcan A. The role of serum CA-125 levels and CA-125 tissue expression positivity in the prediction of the recurrence of stage III and IV epithelial ovarian tumors (CA-125 levels and tissue CA-125 in ovarian tumors). *Arch Gynecol Obstet* 2011;283(6):1397-402.
11. Davies JC, Wainwright CE, Canny GJ, Chilvers MA, Howenstine MS, Munck A, Mainz JG, Rodriguez S, Li H, Yen K, Ordoñez CL, Ahrens R, Group VXS. Efficacy and Safety of Ivacaftor in

- Patients Aged 6 to 11 Years with Cystic Fibrosis with a *G551D* Mutation. *American Journal of Respiratory and Critical Care Medicine* 2013;187(11):1219-1225.
12. American Association for the Study of Liver Diseases and the Infectious Diseases Society of America. When and in Whom to Initiate HCV Therapy. In: *HCV Guidance: Recommendations for Testing, Managing, and Treating Hepatitis C*; 2018.
  13. American Association for the Study of Liver Diseases and the Infectious Diseases Society of America. Monitoring Patients Who Are Starting HCV Treatment, Are on Treatment, or Have Completed Therapy. In: *HCV Guidance: Recommendations for Testing, Managing, and Treating Hepatitis C*; 2018.
  14. Nielsen MJ, Veidal SS, Karsdal MA, Ørsnes-Leeming DJ, Vainer B, Gardner SD, Hamatake R, Goodman ZD, Schuppan D, Patel K. Plasma Pro-C3 (N-terminal type III collagen propeptide) predicts fibrosis progression in patients with chronic hepatitis C. *Liver international : official journal of the International Association for the Study of the Liver* 2015;35(2):429-37.
  15. Basu NN, Ingham S, Hodson J, Laloo F, Bulman M, Howell A, Evans DG. Risk of contralateral breast cancer in BRCA1 and BRCA2 mutation carriers: a 30-year semi-prospective analysis. *Familial Cancer* 2015;14(4):531--538.
  16. Kujovich JL. Factor V Leiden thrombophilia. *Genetics in Medicine* 2011;13(1):1--16.
  17. Henriksen K, Christiansen C, Karsdal MA. Role of biochemical markers in the management of osteoporosis. *Climacteric* 2015;18 Suppl 2:10-8.
  18. Stone NJ, Robinson JG, Lichtenstein AH, Bairey Merz CN, Blum CB, Eckel RH, Goldberg AC, Gordon D, Levy D, Lloyd-Jones DM, McBride P, Schwartz JS, Shero ST, Smith SC, Watson K, Wilson PWF, American College of Cardiology/American Heart Association Task Force on Practice G. 2013 ACC/AHA Guideline on the Treatment of Blood Cholesterol to Reduce Atherosclerotic Cardiovascular Risk in Adults. *Journal of the American College of Cardiology* 2014;63(25):2889-2934.
  19. American Diabetes A. *Diabetes care: American Diabetes Association*; 1978.
  20. Parks M. NDA/BLA #207988. In: Office Deputy Director Decisional Memo: FDA Center for Drug Development and Research; 2015.
  21. Siu AL, Force USPST. Screening for Abnormal Blood Glucose and Type 2 Diabetes Mellitus: U.S. Preventive Services Task Force Recommendation Statement. *Annals of Internal Medicine* 2015;163(11):861-861.
  22. Scott DW, Wright GW, Williams PM, Lih CJ, Walsh W, Jaffe ES, Rosenwald A, Campo E, Chan WC, Connors JM, Smeland EB, Mottok A, Braziel RM, Ott G, Delabie J, Tubbs RR, Cook JR, Weisenburger DD, Greiner TC, Glinzmann-Gibson BJ, Fu K, Staudt LM, Gascoyne RD, Rimsza LM. Determining cell-of-origin subtypes of diffuse large B-cell lymphoma using gene expression in formalin-fixed paraffin-embedded tissue. *Blood* 2014;123(8):1214--1217.
  23. Senior JR. Evolution of the Food and Drug Administration Approach to Liver Safety Assessment for New Drugs: Current Status and Challenges. *Drug Safety* 2014;37(S1):9--17.
  24. Wasung ME, Chawla LS, Madero M. Biomarkers of renal function, which and when? *Clinica Chimica Acta* 2015;438:350--357.
  25. Food and Drug Administration. Subpart H--Accelerated Approval of New Drugs for Serious or Life-Threatening Illnesses In: *Services HaH*, editor.; 2017.
  26. Food and Drug Administration. Subpart E--Accelerated Approval of Biological Products for Serious or Life-Threatening Illnesses. In: *Services HaH*, editor.; 2017.
  27. Food and Drug Administration. Guidance for Industry: Expedited Programs for Serious Conditions – Drugs and Biologics. In; 2014.
  28. Montezuma-Rusca JM, Powers JH, Follmann D, Wang J, Sullivan B, Williamson PR. Early Fungicidal Activity as a Candidate Surrogate Endpoint for All-Cause Mortality in Cryptococcal Meningitis: A Systematic Review of the Evidence. *PLOS ONE* 2016;11(8):e0159727-e0159727.
  29. Food and Drug Administration. Guidance for Industry: Clinical Development Programs for Drugs, Devices and Biological Products Intended for the Treatment of OA In. Rockville: U.S. Department of Health and Human Services; 1999.
  30. Fleming T. Surrogate endpoints and FDA's accelerated approval process. *Health Aff (Millwood)* 2005;24(1):67-78. *Health Aff (Millwood)* 2005;24(1):67-78.
  31. Fleming TR, Powers JH. Biomarkers and surrogate endpoints in clinical trials. *Stat Med* 2012;31(25):2973-84.

32. Zaheer S, LeBoff M, Lewiecki EM. Denosumab for the treatment of osteoporosis. *Expert Opin Drug Metab Toxicol* 2015;11(3):461-70.
33. Black DM, Delmas PD, Eastell R, Reid IR, Boonen S, Cauley JA, Cosman F, Lakatos P, Leung PC, Man Z, Mautalen C, Mesenbrink P, Hu H, Caminis J, Tong K, Rosario-Jansen T, Krasnow J, Hue TF, Sellmeyer D, Eriksen EF, Cummings SR, Trial HPF. Once-yearly zoledronic acid for treatment of postmenopausal osteoporosis. *The New England journal of medicine* 2007;356(18):1809-22.
34. Cummings SR, San Martin J, McClung MR, Siris ES, Eastell R, Reid IR, Delmas P, Zoog HB, Austin M, Wang A, Kutilek S, Adami S, Zanchetta J, Libanati C, Siddhanti S, Christiansen C, Trial F. Denosumab for prevention of fractures in postmenopausal women with osteoporosis. *The New England journal of medicine* 2009;361(8):756-65.
35. Henriksen K, Byrjalsen I, Andersen JR, Bihlet AR, Russo LA, Alexandersen P, Valter I, Qvist P, Lau E, Riis BJ, Christiansen C, Karsdal MA. A randomized, double-blind, multicenter, placebo-controlled study to evaluate the efficacy and safety of oral salmon calcitonin in the treatment of osteoporosis in postmenopausal women taking calcium and vitamin D. *Bone* 2016;91.
36. Liberman UA, Weiss SR, Bröll J, Minne HW, Quan H, Bell NH, Rodriguez-Portales J, Downs RW, Dequeker J, Favus M. Effect of oral alendronate on bone mineral density and the incidence of fractures in postmenopausal osteoporosis. The Alendronate Phase III Osteoporosis Treatment Study Group. *The New England journal of medicine* 1995;333(22):1437-43.
37. Miller PD, Hattersley G, Riis BJ, Williams GC, Lau E, Russo LA, Alexandersen P, Zerbini CAF, Hu M-y, Harris AG, Fitzpatrick LA, Cosman F, Christiansen C, Investigators AS. Effect of Abaloparatide vs Placebo on New Vertebral Fractures in Postmenopausal Women With Osteoporosis: A Randomized Clinical Trial. *JAMA* 2016;316(7):722-33.
38. Neer RM, Arnaud CD, Zanchetta JR, Prince R, Gaich GA, Reginster JY, Hodsman AB, Eriksen EF, Ish-Shalom S, Genant HK, Wang O, Mitlak BH. Effect of parathyroid hormone (1-34) on fractures and bone mineral density in postmenopausal women with osteoporosis. *The New England journal of medicine* 2001;344(19):1434-41.
39. Friedman SL, Ratziu V, Harrison SA, Abdelmalek MF, Aithal GP, Caballeria J, Francque S, Farrell G, Kowdley KV, Craxi A, Simon K, Fischer L, Melchor-Khan L, Vest J, Wiens BL, Vig P, Seyedkazemi S, Goodman Z, Wong VW, Loomba R, Tacke F, Sanyal A, Lefebvre E. A randomized, placebo-controlled trial of cenicriviroc for treatment of nonalcoholic steatohepatitis with fibrosis. *Hepatology* 2018;67(5):1754-1767.
40. Neuschwander-Tetri BA, Loomba R, Sanyal AJ, Lavine JE, Van Natta ML, Abdelmalek MF, Chalasani N, Dasarathy S, Diehl AM, Hameed B, Kowdley KV, McCullough A, Terrault N, Clark JM, Tonascia J, Brunt EM, Kleiner DE, Doo E, Network NCR. Farnesoid X nuclear receptor ligand obeticholic acid for non-cirrhotic, non-alcoholic steatohepatitis (FLINT): a multicentre, randomised, placebo-controlled trial. *Lancet (London, England)* 2015;385(9972):956-65.
41. Ratziu V, Harrison SA, Francque S, Bedossa P, Lehert P, Serfaty L, Romero-Gomez M, Boursier J, Abdelmalek M, Caldwell S, Drenth J, Anstee QM, Hum D, Hanf R, Roudot A, Megnier S, Staels B, Sanyal A, Group G-IS. Elafibranor, an Agonist of the Peroxisome Proliferator-Activated Receptor- $\alpha$  and - $\delta$ , Induces Resolution of Nonalcoholic Steatohepatitis Without Fibrosis Worsening. *Gastroenterology* 2016;150(5):1147-1159.e5.
42. Ferrannini E, Seman L, Seewaldt-Becker E, Hantel S, Pinnett S, Woerle HJ. A Phase IIb, randomized, placebo-controlled study of the SGLT2 inhibitor empagliflozin in patients with type 2 diabetes. *Diabetes, obesity & metabolism* 2013;15(8):721-8.
43. Henry RR, Lincoff AM, Mudaliar S, Rabbia M, Chognot C, Herz M. Effect of the dual peroxisome proliferator-activated receptor- $\alpha$ / $\gamma$  agonist aleglitazar on risk of cardiovascular disease in patients with type 2 diabetes (SYNCHRONY): a phase II, randomised, dose-ranging study. *Lancet (London, England)* 2009;374(9684):126-35.
44. Nauck MA, Petrie JR, Sesti G, Mannucci E, Courrèges J-P, Lindegaard ML, Jensen CB, Atkin SL, Study I. A Phase 2, Randomized, Dose-Finding Study of the Novel Once-Weekly Human GLP-1 Analog, Semaglutide, Compared With Placebo and Open-Label Liraglutide in Patients With Type 2 Diabetes. *Diabetes care* 2016;39(2):231-41.
45. Ahrén B, Masmiquel L, Kumar H, Sargin M, Karsbøl JD, Jacobsen SH, Chow F. Efficacy and safety of once-weekly semaglutide versus once-daily sitagliptin as an add-on to metformin,

- thiazolidinediones, or both, in patients with type 2 diabetes (SUSTAIN 2): a 56-week, double-blind, phase 3a, randomised trial. *The lancet. Diabetes & endocrinology* 2017;5(5):341-354.
46. Henriksen K, Byrjalsen I, Qvist P, Beck-Nielsen H, Hansen G, Riis BJ, Perrild H, Svendsen OL, Gram J, Karsdal MA, Christiansen C, Investigators BT. Efficacy and safety of the PPAR $\gamma$  partial agonist balaglitazone compared with pioglitazone and placebo: a phase III, randomized, parallel-group study in patients with type 2 diabetes on stable insulin therapy. *Diabetes/metabolism research and reviews* 2011;27(4):392-401.
  47. Ridderstråle M, Andersen KR, Zeller C, Kim G, Woerle HJ, Broedl UC, investigators E-RHHSt. Comparison of empagliflozin and glimepiride as add-on to metformin in patients with type 2 diabetes: a 104-week randomised, active-controlled, double-blind, phase 3 trial. *The lancet. Diabetes & endocrinology* 2014;2(9):691-700.
  48. Roden M, Weng J, Eilbracht J, Delafont B, Kim G, Woerle HJ, Broedl UC, investigators E-RMt. Empagliflozin monotherapy with sitagliptin as an active comparator in patients with type 2 diabetes: a randomised, double-blind, placebo-controlled, phase 3 trial. *The lancet. Diabetes & endocrinology* 2013;1(3):208-19.
  49. Seino Y, Terauchi Y, Osonoi T, Yabe D, Abe N, Nishida T, Zacho J, Kaneko S. Safety and efficacy of semaglutide once weekly vs sitagliptin once daily, both as monotherapy in Japanese people with type 2 diabetes. *Diabetes, obesity & metabolism* 2018;20(2):378-388.
  50. Sorli C, Harashima S-I, Tsoukas GM, Unger J, Karsbøl JD, Hansen T, Bain SC. Efficacy and safety of once-weekly semaglutide monotherapy versus placebo in patients with type 2 diabetes (SUSTAIN 1): a double-blind, randomised, placebo-controlled, parallel-group, multinational, multicentre phase 3a trial. *The lancet. Diabetes & endocrinology* 2017;5(4):251-260.
  51. Liao H-W, Saver JL, Wu Y-L, Chen T-H, Lee M, Ovbiagele B. Pioglitazone and cardiovascular outcomes in patients with insulin resistance, pre-diabetes and type 2 diabetes: a systematic review and meta-analysis. *BMJ open* 2017;7(1):e013927-e013927.
  52. Marso SP, Bain SC, Consoli A, Eliaschewitz FG, Jódar E, Leiter LA, Lingvay I, Rosenstock J, Seufert J, Warren ML, Woo V, Hansen O, Holst AG, Pettersson J, Vilsbøll T, Investigators S-. Semaglutide and Cardiovascular Outcomes in Patients with Type 2 Diabetes. *The New England journal of medicine* 2016;375(19):1834-1844.
  53. Marso SP, Daniels GH, Brown-Frandsen K, Kristensen P, Mann JFE, Nauck MA, Nissen SE, Pocock S, Poulter NR, Ravn LS, Steinberg WM, Stockner M, Zinman B, Bergenstal RM, Buse JB, Committee LS, Investigators LT. Liraglutide and Cardiovascular Outcomes in Type 2 Diabetes. *The New England journal of medicine* 2016;375(4):311-22.
  54. Neal B, Perkovic V, Mahaffey KW, de Zeeuw D, Fulcher G, Erondy N, Shaw W, Law G, Desai M, Matthews DR, Group CPC. Canagliflozin and Cardiovascular and Renal Events in Type 2 Diabetes. *The New England journal of medicine* 2017;377(7):644-657.
  55. Zinman B, Wanner C, Lachin JM, Fitchett D, Bluhmki E, Hantel S, Mattheus M, Devins T, Johansen OE, Woerle HJ, Broedl UC, Inzucchi SE, Investigators E-RO. Empagliflozin, Cardiovascular Outcomes, and Mortality in Type 2 Diabetes. *The New England journal of medicine* 2015;373(22):2117-28.
  56. Bagger YZ, Tankó LB, Alexandersen P, Karsdal MA, Olson M, Mindeholm L, Azria M, Christiansen C. Oral salmon calcitonin induced suppression of urinary collagen type II degradation in postmenopausal women: A new potential treatment of osteoarthritis. *Bone* 2005;37(3).
  57. Hellio le Graverand M-P, Clemmer RS, Redifer P, Brunell RM, Hayes CW, Brandt KD, Abramson SB, Manning PT, Miller CG, Vignon E. A 2-year randomised, double-blind, placebo-controlled, multicentre study of oral selective iNOS inhibitor, cindunistat (SD-6010), in patients with symptomatic osteoarthritis of the knee. *Annals of the rheumatic diseases* 2013;72(2):187-95.
  58. Karsdal MA, Michaelis M, Ladel C, Siebuhr AS, Bihlet AR, Andersen JR, Guehring H, Christiansen C, Bay-Jensen AC, Kraus VB. Disease-modifying treatments for osteoarthritis (DMOADs) of the knee and hip: lessons learned from failures and opportunities for the future. *Osteoarthritis and Cartilage* 2016;24(12).
  59. Spector TD, Conaghan PG, Buckland-Wright JC, Garner P, Cline GA, Beary JF, Valent DJ, Meyer JM. Effect of risedronate on joint structure and symptoms of knee osteoarthritis: results of the BRISK randomized, controlled trial [ISRCTN01928173]. *Arthritis research & therapy* 2005;7(3):R625-33.

60. Bingham CO, Buckland-Wright JC, Garnero P, Cohen SB, Dougados M, Adami S, Clauw DJ, Spector TD, Pelletier J-P, Raynauld J-P, Strand V, Simon LS, Meyer JM, Cline GA, Beary JF. Risedronate decreases biochemical markers of cartilage degradation but does not decrease symptoms or slow radiographic progression in patients with medial compartment osteoarthritis of the knee: results of the two-year multinational knee osteoarthritis st. *Arthritis and rheumatism* 2006;54(11):3494--507.
61. Karsdal MA, Byrjalsen I, Alexandersen P, Bihlet A, Andersen JR, Riis BJ, Bay-Jensen AC, Christiansen C. Treatment of symptomatic knee osteoarthritis with oral salmon calcitonin: Results from two phase 3 trials. *Osteoarthritis and Cartilage* 2015;23(4).
